# Supplementary material for: Human Cytomegalovirus Infection Upregulates the Mitochondrial Transcription and Translation Machineries
Source: PubMed Central journal article supplement (PMC4807356; doi:10.1128/mbio.00029-16), 2016-03-29

Figure S5

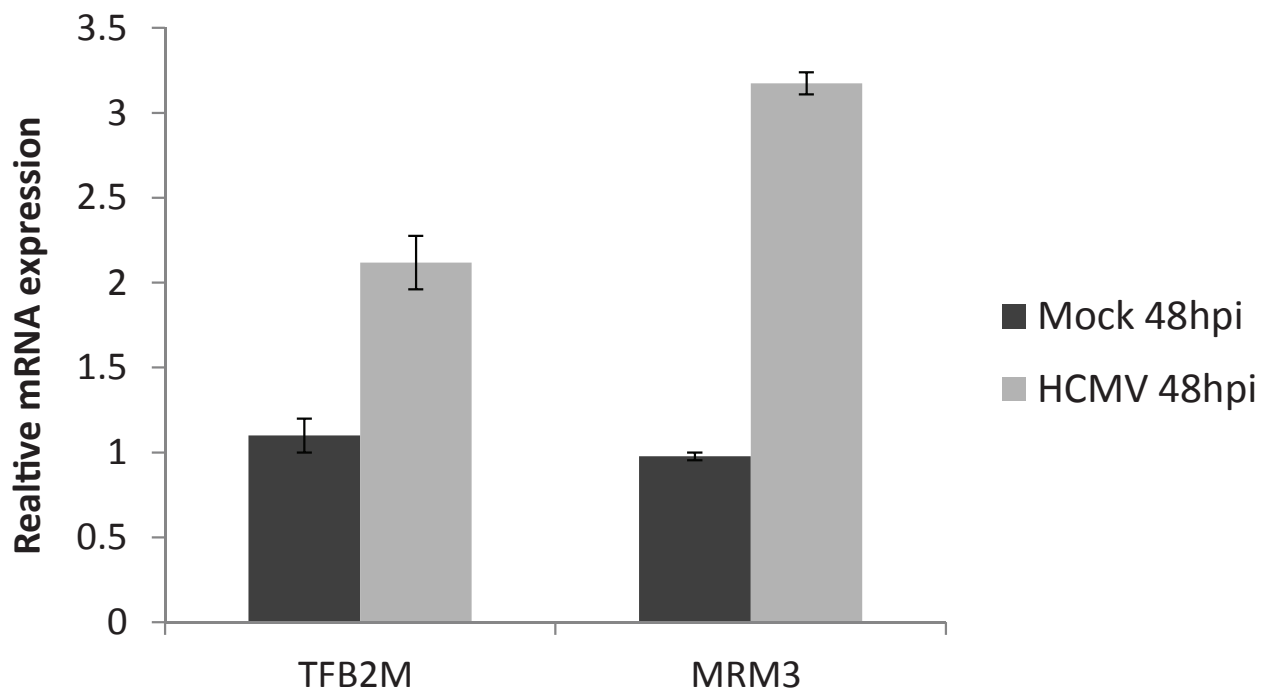

Supplement: mbo002162741sf5.pdf [file mbo002162741sf5.pdf]
